# Supplementary material for: Genetic structure of fragmented southern populations of African Cape buffalo (Syncerus caffer caffer)
Source: PubMed Central journal article supplement (PMC4232705; doi:10.1186/s12862-014-0203-2), 2014-11-01

# Components 1 and 2

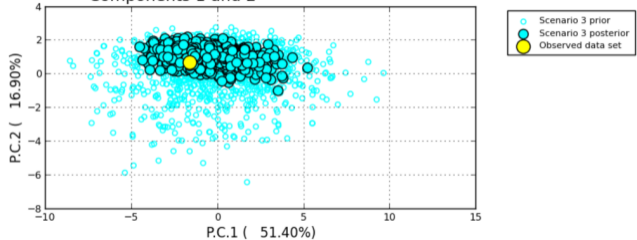

Supplement: 12862_2014_203_MOESM4_ESM.pdf [file 12862_2014_203_MOESM4_ESM.pdf]
